# Supplementary material
Source: ML conference proceedings conference paper supplement (https://openreview.net/forum?id=O23XfTnhWR)
Supplement: supplementary_material [file attachment]

# Browse experiment results ...

```
In [ ]:
import torch
import pickle
import glob
import os.path
import pandas as pd
from train_engine import __training_cfg, __exp_res_meta
import numpy as np
# from core.utils_ipynb import read_exp_result_files
import os

def read_exp_result_files(path):
    files = glob.glob(os.path.join(path, "*.pickle"))
    res = []
    for f in files:
        if os.path.basename(f) == 'errors.pickle':
            continue

        r = pickle.load(open(f, 'rb'))

        #older cfgs have no 'set_node_degree_uninformative' ...
        if 'set_node_degree_uninformative' not in r['exp_cfg']['model']:
            r['exp_cfg']['model']['set_node_degree_uninformative'] = False

        res.append(r)
    return res

def get_keychain_value_iter(d, key_chain=None):
    key_chain = [] if key_chain is None else list(key_chain).copy()

    if not isinstance(d, dict):
        yield tuple(key_chain), d
    else:
        for k, v in d.items():
            yield from get_keychain_value_iter(v, key_chain + [k])

def get_keychain_value(d, key_chain):

    try:
        for k in key_chain:
            d = d[k]

    except Exception as ex:
        raise KeyError() from ex

    return d
```

```
In [ ]:
kc = {k: k[-1] for k, v in list(get_keychain_value_iter(__exp_res_meta))}
kc
```

```
Out [ ]:
{('exp_cfg', 'dataset_name'): 'dataset_name',
 ('exp_cfg', 'training', 'lr'): 'lr',
 ('exp_cfg', 'training', 'lr_drop_fact'): 'lr_drop_fact',
 ('exp_cfg', 'training', 'num_epochs'): 'num_epochs',
 ('exp_cfg', 'training', 'epoch_step'): 'epoch_step',
 ('exp_cfg', 'training', 'batch_size'): 'batch_size',
 ('exp_cfg', 'training', 'weight_decay'): 'weight_decay',
 ('exp_cfg', 'training', 'validation_ratio'): 'validation_ratio',
 ('exp_cfg', 'model', 'model_type'): 'model_type',
 ('exp_cfg',
 'model',
 'use_super_level_set_filtration'): 'use_super_level_set_filtration',
 ('exp_cfg', 'model', 'use_node_degree'): 'use_node_degree',
 ('exp_cfg',
 'model',
 'set_node_degree_uninformative'): 'set_node_degree_uninformative',
 ('exp_cfg', 'model', 'pooling_strategy'): 'pooling_strategy',
 ('exp_cfg', 'model', 'use_node_label'): 'use_node_label',
 ('exp_cfg', 'model', 'gin_number'): 'gin_number',
 ('exp_cfg', 'model', 'gin_dimension'): 'gin_dimension',
 ('exp_cfg', 'model', 'gin_mlp_type'): 'gin_mlp_type',
 ('exp_cfg', 'model', 'num_struct_elements'): 'num_struct_elements',
 ('exp_cfg', 'model', 'cls_hidden_dimension'): 'cls_hidden_dimension',
 ('exp_cfg', 'model', 'drop_out'): 'drop_out',
 ('exp_cfg', 'tag'): 'tag',
 ('cv_test_acc',): 'cv_test_acc',
 ('cv_val_acc',): 'cv_val_acc',
 ('cv_indices_trn_tst_val',): 'cv_indices_trn_tst_val',
 ('cv_epoch_loss',): 'cv_epoch_loss',
 ('start_time',): 'start_time',
 ('id',): 'id'}
```

```
In [ ]:
COL_NAMES = {
    ('exp_cfg', 'dataset_name'): 'dataset_name',
    #('exp_cfg', 'tag'): 'tag',
    # ('exp_cfg', 'training', 'lr'): 'lr',
    # ('exp_cfg', 'training', 'lr_drop_fact'): 'lr_drop_fact',
    # ('exp_cfg', 'training', 'num_epochs'): 'num_epochs',
    # ('exp_cfg', 'training', 'epoch_step'): 'epoch_step',
    ('exp_cfg', 'training', 'batch_size'): 'batch_size',
    # ('exp_cfg', 'training', 'weight_decay'): 'weight_decay',
    # ('exp_cfg', 'training', 'validation_ratio'): 'validation_ratio',
    ('exp_cfg', 'model', 'model_type'): 'model_type',
    ('exp_cfg', 'model', 'use_super_level_set_filtration'): 'use_super_level_set_filtration',
    ('exp_cfg', 'model', 'use_node_degree'): 'use_node_degree',
    ('exp_cfg', 'model', 'use_node_label'): 'use_node_label',
    ('exp_cfg', 'model', 'gin_number'): 'gin_number',
    ('exp_cfg', 'model', 'gin_dimension'): 'gin_dimension',
    #('exp_cfg', 'model', 'gin_mlp_type'): 'gin_mlp_type',
    ('exp_cfg', 'model', 'set_node_degree_uninformative'): 'set_node_degree_uninformative',
    ('exp_cfg', 'model', 'num_struct_elements'): 'num_struct_elements',
    ('exp_cfg', 'model', 'drop_out'): 'drop_out',
    ('exp_cfg', 'model', 'pooling_strategy'): 'pooling_strategy',
    # ('cv_test_acc',): 'cv_test_acc',
    # ('cv_val_acc',): 'cv_val_acc',
    # ('cv_indices_trn_tst_val',): 'cv_indices_trn_tst_val',
    # ('cv_epoch_loss',): 'cv_epoch_loss',
    # ('start_time',): 'start_time',
    # ('id',): 'id',
    ('finished_training',): 'finished_training'
}
```

```
In [ ]:
def pd_frame(path):

    f = read_exp_result_files(path)

    data_frames = []
    for i, res in enumerate(f):
        row = {}

        cv_acc_last = [x[-1] for x in res['cv_test_acc'] if len(x) > 0]

        row['acc_last_mean'] = np.mean(cv_acc_last)
        row['acc_last_std'] = np.std(cv_acc_last)

        cv_acc_validated = []
        for test, val in zip(res['cv_test_acc'], res['cv_val_acc']):
            if not len(test) == res['__exp_cfg']['training']['num_epochs']:
                continue
            n = len(test)//2
            test = torch.tensor(test[n:])
            val = torch.tensor(val[n:])
            #test = torch.tensor(test)
            #val = torch.tensor(val)

            _, i_max = val.max(0)
            cv_acc_validated.append(test[i_max].item())

        row['acc_val_mean'] = np.mean(cv_acc_validated)
        row['acc_val_std'] = np.std(cv_acc_validated)

        cv_folds_available = sum([1 for cv in res['cv_test_acc'] if len(cv) == res['__exp_cfg']['training']['num_epochs']])
        row['cv_folds_available'] = cv_folds_available

        for k, v in COL_NAMES.items():
            try:
                row[v] = get_keychain_value(res, k)
            except KeyError:
                pass

        f = pd.DataFrame(row, index=[i])

        data_frames.append(f)

    return pd.concat(data_frames, sort=True)
```

```
In [ ]:
path = './experiment_logs/'
RES = pd_frame(path)
RES = RES.sort_values(by=['dataset_name', 'model_type'], ascending=False)
# RES[RES['dataset_name'].str.contains('REDDIT') & (RES['gin_number'] == 3)]
RES
```

| Out [ ]: | acc_last_mean | acc_last_std | acc_val_mean | acc_val_std | batch_size | cv_folds_available | dataset_name    | drop_out | finished_training | gin_dimension | gi |
|----------|---------------|--------------|--------------|-------------|------------|--------------------|-----------------|----------|-------------------|---------------|----|
| 20       | 51.611182     | 8.204332     | 53.771182    | 1.631303    | 64         | 10                 | REDDIT-MULTI-5K | 0.1      | True              | 64            |    |
| 43       | 53.851503     | 2.601825     | 54.311302    | 2.472776    | 64         | 10                 | REDDIT-MULTI-5K | 0.1      | True              | 64            |    |
| 0        | 53.771583     | 1.873286     | 54.991904    | 2.479941    | 64         | 10                 | REDDIT-MULTI-5K | 0.1      | True              | 64            |    |
| 24       | 53.291583     | 2.777682     | 52.691543    | 2.634461    | 64         | 10                 | REDDIT-MULTI-5K | 0.1      | True              | 64            |    |
| 30       | 87.100000     | 3.006659     | 88.850000    | 2.366960    | 64         | 10                 | REDDIT-BINARY   | 0.1      | True              | 64            |    |
| 41       | 87.350000     | 2.775338     | 87.400000    | 3.128898    | 64         | 10                 | REDDIT-BINARY   | 0.1      | True              | 64            |    |
| 46       | 86.350000     | 3.090712     | 85.900000    | 2.662705    | 64         | 10                 | REDDIT-BINARY   | 0.1      | True              | 64            |    |
| 21       | 90.300000     | 1.307670     | 90.500000    | 1.596872    | 64         | 10                 | REDDIT-BINARY   | 0.1      | True              | 64            |    |
| 39       | 89.400000     | 1.609348     | 89.650000    | 1.162970    | 64         | 10                 | REDDIT-BINARY   | 0.1      | True              | 64            |    |
| 44       | 83.950000     | 2.953388     | 85.600000    | 2.517936    | 64         | 10                 | REDDIT-BINARY   | 0.1      | True              | 64            |    |
| 9        | 71.874196     | 3.222069     | 72.679376    | 3.779476    | 64         | 10                 | PROTEINS        | 0.1      | True              | 64            |    |
| 17       | 67.563124     | 2.880053     | 70.889186    | 0.780713    | 64         | 5                  | PROTEINS        | 0.1      | True              | 64            |    |
| 27       | 69.097490     | 3.779691     | 70.803571    | 3.887956    | 64         | 10                 | PROTEINS        | 0.1      | True              | 64            |    |
| 42       | 74.213227     | 2.086025     | 74.662062    | 1.734282    | 64         | 5                  | PROTEINS        | 0.1      | True              | 64            |    |
| 2        | 71.159051     | 2.319949     | 71.967033    | 2.904664    | 64         | 5                  | PROTEINS        | 0.1      | True              | 64            |    |
| 10       | 71.602317     | 3.920555     | 72.772683    | 3.411210    | 64         | 10                 | PROTEINS        | 0.1      | True              | 64            |    |
| 15       | 70.712641     | 3.020149     | 73.046904    | 1.737326    | 64         | 5                  | PROTEINS        | 0.1      | True              | 64            |    |
| 23       | 73.138205     | 2.533780     | 73.497356    | 2.226057    | 64         | 5                  | PROTEINS        | 0.1      | True              | 64            |    |
| 12       | 67.658462     | 3.916730     | 70.435168    | 3.939531    | 64         | 10                 | PROTEINS        | 0.1      | True              | 64            |    |
| 3        | 89.327485     | 4.813917     | 86.754385    | 7.486808    | 64         | 10                 | MUTAG           | 0.1      | True              | 64            |    |
| 28       | 83.976608     | 6.046060     | 82.426900    | 4.201684    | 64         | 10                 | MUTAG           | 0.1      | True              | 64            |    |
| 37       | 83.513514     | 2.581469     | 83.513513    | 1.973298    | 64         | 5                  | MUTAG           | 0.1      | True              | 64            |    |
| 25       | 88.805121     | 3.601307     | 89.345662    | 1.780311    | 64         | 5                  | MUTAG           | 0.1      | True              | 64            |    |
| 1        | 88.264580     | 3.704449     | 88.805121    | 4.904055    | 64         | 5                  | MUTAG           | 0.1      | True              | 64            |    |
| 45       | 84.035088     | 7.854783     | 85.643274    | 4.730069    | 64         | 10                 | MUTAG           | 0.1      | True              | 64            |    |
| 13       | 86.695906     | 6.356876     | 86.666666    | 6.025379    | 64         | 10                 | MUTAG           | 0.1      | True              | 64            |    |
| 31       | 50.333333     | 2.586289     | 51.466667    | 2.454927    | 64         | 10                 | IMDB-MULTI      | 0.1      | True              | 64            |    |
| 11       | 49.600000     | 3.028751     | 49.400001    | 2.943165    | 64         | 10                 | IMDB-MULTI      | 0.1      | True              | 64            |    |
| 36       | 74.200000     | 2.821347     | 74.700000    | 3.163858    | 64         | 10                 | IMDB-BINARY     | 0.1      | True              | 64            |    |
| 5        | 73.700000     | 3.348134     | 75.500000    | 2.801785    | 64         | 10                 | IMDB-BINARY     | 0.1      | True              | 64            |    |
| 4        | 72.600000     | 1.462874     | 73.700000    | 2.014944    | 64         | 5                  | IMDB-BINARY     | 0.1      | True              | 64            |    |
| 38       | 73.100000     | 2.200000     | 74.200000    | 1.503330    | 64         | 5                  | IMDB-BINARY     | 0.1      | True              | 64            |    |
| 33       | 74.900000     | 3.039737     | 73.100000    | 3.389690    | 64         | 10                 | IMDB-BINARY     | 0.1      | True              | 64            |    |
| 7        | 74.900000     | 2.981610     | 74.400000    | 3.555278    | 64         | 10                 | IMDB-BINARY     | 0.1      | True              | 64            |    |
| 35       | 78.463158     | 5.802750     | 78.721053    | 6.219219    | 64         | 10                 | DHFR            | 0.1      | True              | 64            |    |
| 19       | 79.770175     | 6.721874     | 80.701752    | 5.814899    | 64         | 10                 | DHFR            | 0.1      | True              | 64            |    |
| 32       | 75.662252     | 3.081428     | 75.528932    | 0.728321    | 64         | 5                  | DHFR            | 0.1      | True              | 64            |    |
| 16       | 78.702510     | 2.356774     | 76.725340    | 2.764108    | 64         | 5                  | DHFR            | 0.1      | True              | 64            |    |
| 29       | 79.643860     | 6.298231     | 78.454385    | 4.668299    | 64         | 10                 | DHFR            | 0.1      | True              | 64            |    |
| 34       | 78.046358     | 2.908635     | 76.589403    | 3.105531    | 64         | 5                  | DHFR            | 0.1      | True              | 64            |    |
| 26       | 77.782456     | 4.499432     | 77.380701    | 4.591231    | 64         | 10                 | DHFR            | 0.1      | True              | 64            |    |
| 6        | 79.222942     | 4.891501     | 80.291397    | 2.560826    | 64         | 10                 | COX2            | 0.1      | True              | 64            |    |
| 8        | 78.802035     | 4.885647     | 80.712305    | 2.813944    | 64         | 10                 | COX2            | 0.1      | True              | 64            |    |
| 14       | 80.301990     | 1.574569     | 81.372685    | 0.802416    | 64         | 5                  | COX2            | 0.1      | True              | 64            |    |
| 18       | 78.805765     | 2.136796     | 78.798900    | 0.502047    | 64         | 5                  | COX2            | 0.1      | True              | 64            |    |
| 22       | 82.656143     | 1.838411     | 81.585449    | 2.656718    | 64         | 5                  | COX2            | 0.1      | True              | 64            |    |
| 47       | 80.527290     | 3.307624     | 78.820537    | 3.389812    | 64         | 10                 | COX2            | 0.1      | True              | 64            |    |
| 40       | 79.449584     | 3.676848     | 80.721555    | 2.563945    | 64         | 10                 | COX2            | 0.1      | True              | 64            |    |

The following cells contain some utility for messing around with results, i.e., deleting etc.
